# Supplementary material for: Solvent-assisted preparation of low-temperature SnO2 electron transport layers for efficient and stable perovskite solar cells made in ambient conditions
Source: Royal Society of Chemistry journal article supplement (doi:10.1039/d2nj00822j), 2022-01-01
Supplement: d2nj00822j1.pdf [file d2nj00822j1.pdf]

Electronic Supplementary Information  
NEW JOURNAL OF CHEMISTRY

**Solvent-assisted preparation of low-temperature SnO<sub>2</sub>  
electron transport layers for efficient and stable perovskite  
solar cells made in ambient conditions**

*JingYan Liu, Xiong He, Xin Li\*, Ying Li\**

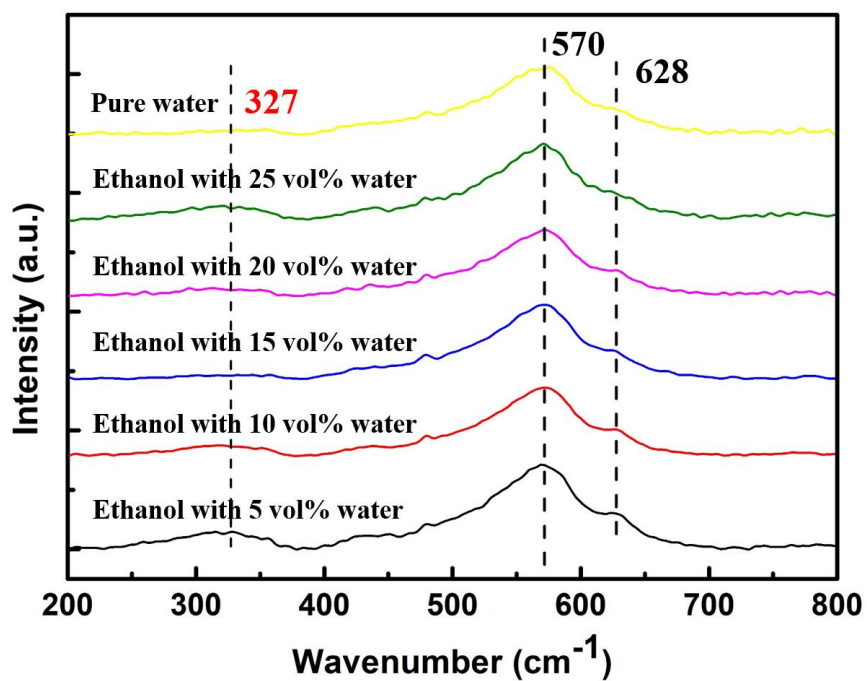

Fig. S1. Raman spectra of SnO<sub>2</sub> nanocrystals which prepared using different solutions.

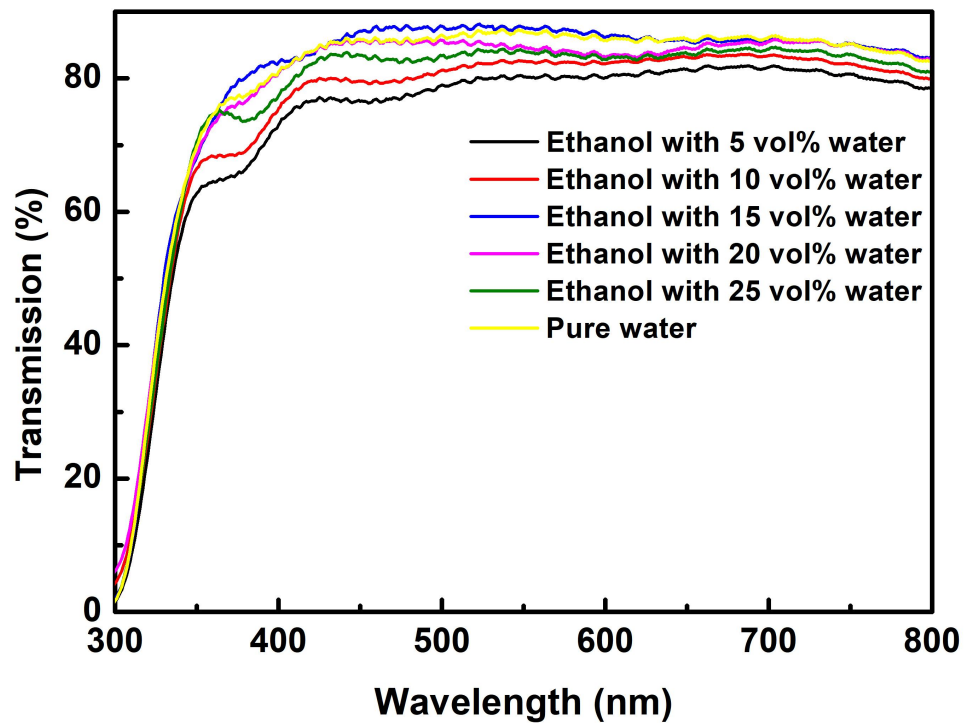

Fig. S2. UV-visible spectra of FTO/SnO<sub>2</sub> prepared using different solutions.

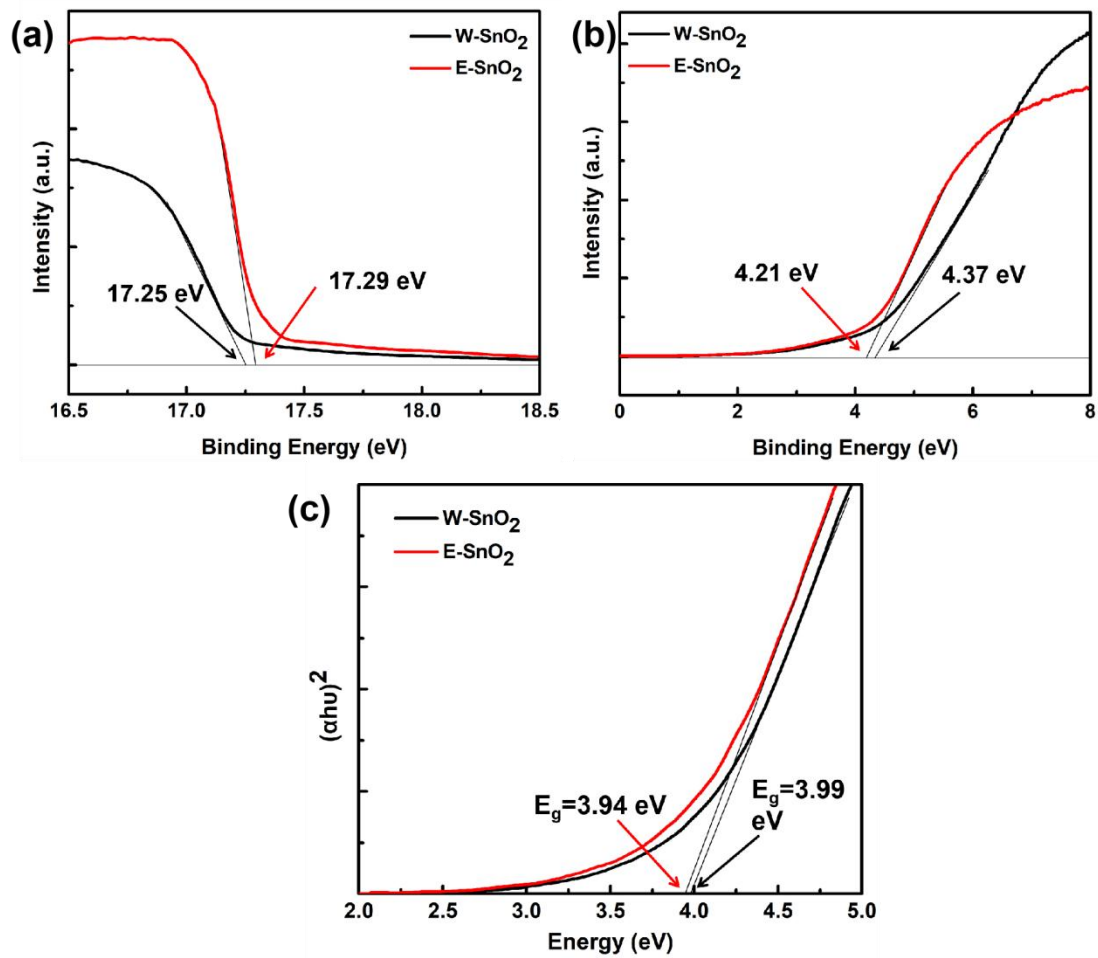

**Fig. S3.** (a), (b)UPS spectra describing the cut-off energy and onset energy boundaries for W-SnO<sub>2</sub> and E-SnO<sub>2</sub>. (c) The band gaps of W-SnO<sub>2</sub> and E-SnO<sub>2</sub>.

The average decay time ( $\tau_{ave}$ ) is calculated by Eq. (S.1) [1]

$$\tau_{ave} = \sum_{i=1}^n A_i \tau_i \quad (\text{S.1})$$

Here,  $\tau_{ave}$  is average decay time,  $A_i$  is the decay amplitude, and  $\tau_i$  is the decay time.

The hysteresis index (HI) is calculated by Eq. (S.2)

$$HI = \frac{PCE_{\text{reverse}} - PCE_{\text{forward}}}{PCE_{\text{reverse}}} \quad (\text{S.2})$$

The trap-state density ( $n_{\text{trap}}$ ) is calculated by the the Eq. (S.3) [2]

$$n_{\text{trap}} = \frac{2\varepsilon\varepsilon_0V_{\text{TFL}}}{eL^2} \quad (\text{S.3})$$

Where  $\varepsilon_0$  is the vacuum permittivity ( $\varepsilon_0=8.85\times 10^{-12}$  F/m),  $\varepsilon$  is the relative dielectric constant of the perovskite ( $\varepsilon_{\text{perovskite}}\approx 35$ ),  $e$  is the elemental charge ( $e=1.6\times 10^{-19}$  C), and  $L$  is the thickness of the measured perovskite film.

**Table S1.** ZView2 fitting parameters obtained from the EIS data of the champion E-SnO<sub>2</sub>-PSC and W-SnO<sub>2</sub>-PSC.

| Device                  | $R_s$ | $R_{rec}$ | C                    |
|-------------------------|-------|-----------|----------------------|
| E-SnO <sub>2</sub> -PSC | 49.38 | 1816.04   | 7.831E <sup>-9</sup> |
| W-SnO <sub>2</sub> -PSC | 68.41 | 952.32    | 5.081E <sup>-9</sup> |



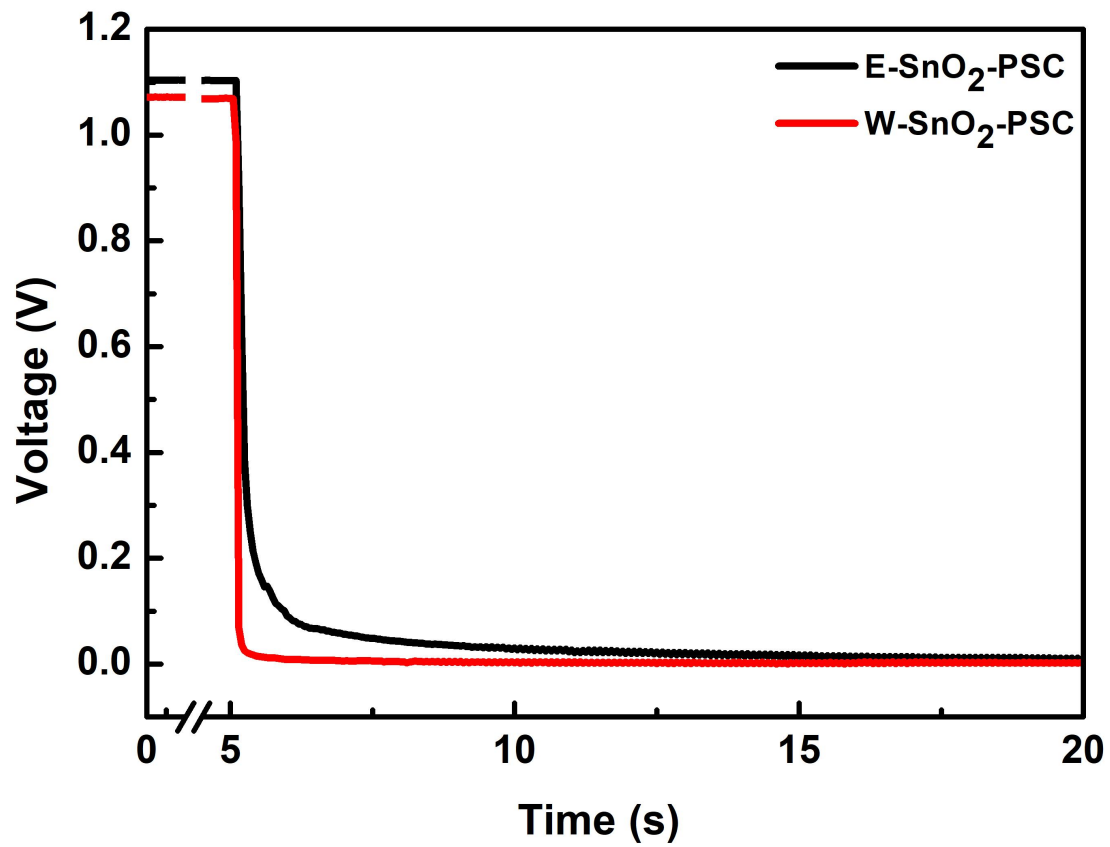

Fig. S4. OCVD curves for E-SnO<sub>2</sub>-PSC and W-SnO<sub>2</sub>-PSC.

## **References:**

- [1] B. Wu, K. Fu, N. Yantara, G. Xing, S. Sun, T. Sum, N. Mathews, *Adv. Energy Mater.* 5 (2015) 1500829.
- [2] Q. Dong, Y. Fang, Y. Shao, P. Mulligan, J. Qiu, L. Cao, J. Huang, *Science* 347 (2015) 967-970.
